# Supplementary material for: Enhanced lithium storage in Fe2O3–SnO2–C nanocomposite anode with a breathable structure
Source: Royal Society of Chemistry journal article supplement (doi:10.1039/c3nr00690e), 2013-01-01
Supplement: c3nr00690e.pdf [file c3nr00690e.pdf]

## Enhanced lithium storage in $\text{Fe}_2\text{O}_3\text{-SnO}_2\text{-C}$ nanocomposite anode with a breathable structure

Md Mokhlesur Rahman\*, Alexey M. Glushenkov, Thrinathreddy Ramireddy, Tao Tao, Ying Chen\*

Institute for Frontier Materials, Deakin University, Waurn Ponds, VIC 3216, Australia

E-mail: m.rahman@deakin.edu.au; ian.chen@deakin.edu.au

**Fig. S1.**

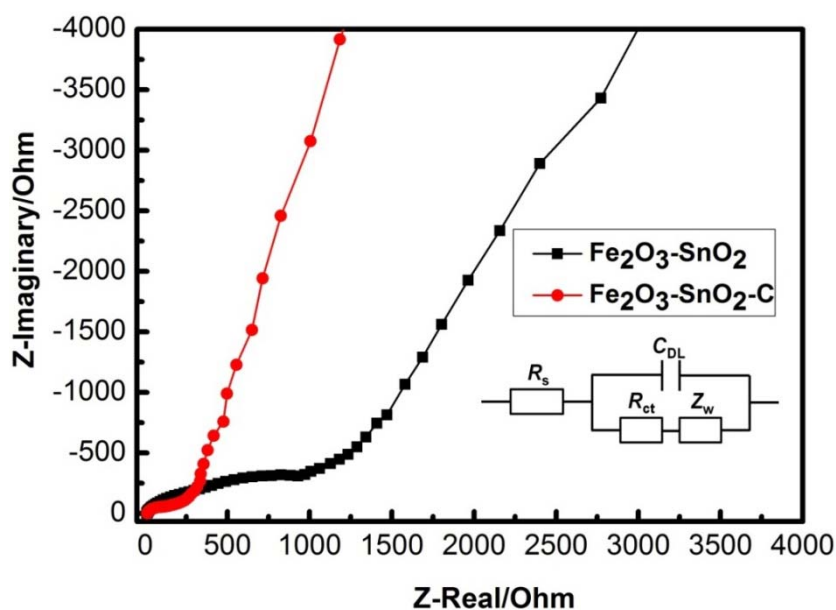

**Fig. S1** Electrochemical impedance spectra for the fresh cells of the  $\text{Fe}_2\text{O}_3\text{-SnO}_2$  and  $\text{Fe}_2\text{O}_3\text{-SnO}_2\text{-C}$  electrodes and the corresponding equivalent circuit (inset) model.

The Nyquist plots are semicircular in the high to medium frequency range, which reflects the charge-transfer resistance ( $R_{ct}$ ) of both electrodes. The value of the intercept indicates the total electrical resistance of the electrolyte ( $R_s$ ). The inclined line represents the

Warburg impedance ( $Z_w$ ) at low frequency, which is associated with lithium-ion diffusion into the  $\text{Fe}_2\text{O}_3\text{-SnO}_2$  particles. The corresponding equivalent circuit for the Nyquist plots of the  $\text{Fe}_2\text{O}_3\text{-SnO}_2$  and  $\text{Fe}_2\text{O}_3\text{-SnO}_2\text{-C}$  electrodes is shown in the inset in Fig. S1, where  $C_{DL}$  represents the double layer capacitance. The values of  $R_{ct}$  for the  $\text{Fe}_2\text{O}_3\text{-SnO}_2$  and  $\text{Fe}_2\text{O}_3\text{-SnO}_2\text{-C}$  electrodes were calculated to be approximately 1457  $\Omega$  and 220  $\Omega$ , respectively. This indicates that  $\text{Fe}_2\text{O}_3\text{-SnO}_2$  particles mixing with Super P  $\text{Li}^{\text{TM}}$  carbon black provides much easier charge transfer at the electrode/electrolyte interface, and consequently decreases the overall battery internal resistance, enabling higher reactivity and lower polarization.<sup>24, 41</sup> The presence of this carbon black in  $\text{Fe}_2\text{O}_3\text{-SnO}_2$  improves the battery performance significantly.

## References

24. M.M. Rahman, J.Z. Wang, M.F. Hassan, S. Chou, Z.X. Chen and H.K. Liu, *Energy Environ. Sci.*, 2011, **4**, 952.
41. M.F. Hassan, M.M. Rahman, Z. Guo, Z. Chen and H.K. Liu, *J. Mater. Chem.*, 2010, **20**, 9707.
